# Supplementary material for: Orthologous proteins of experimental de- and remyelination are differentially regulated in the CSF proteome of multiple sclerosis subtypes
Source: PubMed Central journal article supplement (PMC6095600; doi:10.1371/journal.pone.0202530), 2018-08-16
Supplement: pone.0202530.s001.pdf [file pone.0202530.s001.pdf]

**S1 Table****Protein concentration ( $\mu\text{g/mL}$ ) in the CSF of patients with primary progressive (PP), secondary progressive (SP) and relapsing-remitting (RR) multiple sclerosis**

| <b>PP</b> | <b>SP</b> | <b>RR</b> |
|-----------|-----------|-----------|
| 110       | 240       | 400       |
| 226,7     | 196,7     | 146,7     |
| 244,4     | 163,3     | 154,2     |
| 411,4     | 150       | 241,7     |
| 380       | 183,3     | 170,8     |
| 340       | 263,3     | 116,7     |
| 213,3     | 243,3     | 187,5     |
| 233,3     | 200       | 520,8     |
| 200       | 640       | 173,3     |
| 180       | 520       | 230       |
| 286,7     | 200       | 266,7     |
| 140       | 326,7     | 243,3     |
| 250       | 253,3     | 356,7     |
| 372       | 176,7     | 170       |
| 179,2     | 244,4     | 326,7     |
| 258,3     | 225       | 203,3     |
| 204,2     | 100       | 233,3     |
| 744       | 86,67     | 155,6     |
| 300       | 236,7     | 370       |
| 153,3     | 80        | 250       |
| 253,3     | 173,3     | 336,7     |
| 520,8     | 156,7     | 323,3     |
| 286,7     | 244,4     | 280       |
| 280       | 1190      | 300       |
| 196,7     | 180       | 350       |
| 143,3     | 136,7     | 226,7     |
| 196,7     | 446,4     | 276,7     |
| 226,7     |           | 246,7     |
| 250       |           | 256,7     |

380

156,7

216,7

176,7

176,7

153,3

313,3

110

156,7

196,7

313,3

356,7

---
