# Supplementary material for: Orthologous proteins of experimental de- and remyelination are differentially regulated in the CSF proteome of multiple sclerosis subtypes
Source: PubMed Central journal article supplement (PMC6095600; doi:10.1371/journal.pone.0202530), 2018-08-16
Supplement: pone.0202530.s002.pdf [file pone.0202530.s002.pdf]

**S2 Table**

**Differentially expressed genes in the CPZ model selected for targeted proteomics in MS-CSF and their expression in MS lesions**

| <b>Gene</b>    | <b>Protein</b>                                                   | <b>WM</b> | <b>GM</b> | <b>GWAS</b> | <b>Peptide sequences</b>                        |
|----------------|------------------------------------------------------------------|-----------|-----------|-------------|-------------------------------------------------|
| <i>ADAMTS1</i> | A disintegrin and metalloproteinase with thrombospondin motifs 1 |           |           |             | LGRPSEEDEELVVP ELER<br>QGDVGGTCGVVDDEPRPTGK     |
| <i>AIF1</i>    | Allograft inflammatory factor 1                                  | x         |           |             | YSSDEDLPSKLEGFK<br>LIGEVSSGSGETFSYPDFLR         |
| <i>ANGPTL4</i> | Angiopoietin-related protein 4                                   | x         |           |             | QSG LFEIQPQGSPPFLVNCK<br>MTSDGGWTVIQR           |
| <i>APOC2</i>   | Apolipoprotein C-II                                              |           |           |             | ESLSSYWESAK<br>TAAQNLYEK<br>TYLPAVDEK           |
| <i>AXL</i>     | Tyrosine-protein kinase receptor UFO                             | x         |           |             | CQLQVQGEPPEVHWLR<br>TATITVLPQQPR<br>APLQGTLLGYR |
| <i>B2M</i>     | b2-microglobulin                                                 | x         |           |             | VEHSDLSFSK<br>DWSFYLLYYTEFTPTEK<br>VNHVTL SQPK  |
| <i>CD83</i>    | CD83 antigen                                                     |           |           |             | GQNGSFDAPNERPYSLK<br>LQSIFPDFSK                 |
| <i>CD84</i>    | SLAM family member 5                                             |           |           |             | IHALGPNYNLVISDLR                                |

|               |                                                                  |   |  |                                                    |
|---------------|------------------------------------------------------------------|---|--|----------------------------------------------------|
|               |                                                                  |   |  | ADINTQADPYTTTK                                     |
| <i>CERS2</i>  | Ceramide synthase 2                                              |   |  | APPNATLEHFYLTSGK<br>SRPLANGHPILNNHR                |
| <i>CMTM5</i>  | CKLF-like MARVEL transmembrane domain-containing protein 5       | x |  | DRHPEEGVVAELQGFAVDK<br>HPEEGVVAELQGFAVDK           |
| <i>CNTF</i>   | Ciliary neurotrophic factor                                      |   |  | SDLTALTESYVK<br>NEADGMPINVGDGGLFEK                 |
| <i>CNTN2</i>  | Contactin-2                                                      | x |  | FAQLNLAAEDTR<br>VISDTEADIGSNLR<br>LSLEDSGMYQCVAENK |
| <i>DBNDD2</i> | Dysbindin domain-containing protein 2                            | x |  | LPPLPR                                             |
| <i>DHCR7</i>  | 7-dehydrocholesterol reductase, pathway cholesterol biosynthesis | x |  | LLVSGFWGVAR<br>YTAAVPYR                            |
| <i>EDIL3</i>  | EGF-like repeat and discoidin I-like domain-containing protein 3 | x |  | VTGVITQGAK<br>GNIDNNTPYANSFTPIIK                   |
| <i>ELOVL1</i> | Elongation of very long chain fatty acids protein 1              | x |  | MEAVVNLYQEVMK<br>ALQQNGAPGIAK                      |
| <i>ERBB3</i>  | Receptor tyrosine-protein kinase erbB-3                          | x |  | LTFQLEPNPHTK<br>GFSLLIMK                           |
| <i>FGFR2</i>  | Fibroblast growth factor receptor 2                              | x |  | DAAVISWTK<br>TVLIGEYLQIK                           |

|                |                                        |   |   |   |                                                                  |
|----------------|----------------------------------------|---|---|---|------------------------------------------------------------------|
|                |                                        |   |   |   | DSGLYACTASR                                                      |
| <i>GAL3ST1</i> | Galactosylceramide sulfotransferase    | x |   |   | TASSTLLNILFR<br>ATAWNMLDSHLYR                                    |
| <i>GDF15</i>   | Growth/differentiation factor 15       |   | x |   | ASLEDLGWADWVLSR<br>EVQVTMCIGACPSQFR<br>TDTGVSLQTYDDLAK           |
| <i>GPR65</i>   | Psychosine receptor                    |   |   | x | YLAVVYPLK<br>KVYQAVR                                             |
| <i>GSN</i>     | Gelsolin                               | x |   |   | EVQGFESATFLGYFK<br>QTQVSVLPEGGETPLFK<br>AVEVLPK<br>DSQEEKTEALTSK |
| <i>HCST</i>    | Hematopoietic cell signal transducer   | x |   |   | SPAQEDGK<br>VYINMPGR                                             |
| <i>HP</i>      | Haptoglobin                            |   |   |   | LRTEGDGVYTLNNEK<br>DIAPTLTLYVGK<br>YVMLPVADQDQCIR<br>VTSIQDWVQK  |
| <i>IL12RB1</i> | Interleukin-12 receptor subunit beta-1 |   |   | x | SPEVTLQLYNSVK<br>MEWETPDNQVGAEVQFR<br>FSVEQLGQDGR                |

|               |                                  |   |  |   |                                                                    |
|---------------|----------------------------------|---|--|---|--------------------------------------------------------------------|
| <i>IGF1</i>   | Insulin-like growth factor I     |   |  |   | APQTGIVDECCFR<br>GFYFNKPTGYGSSSR<br>RLEMYCAPLKPAK                  |
| <i>IL33</i>   | Interleukin-33                   |   |  |   | DFWLHANNK<br>TDPGVFIGVK<br>VDSSENLCTENILFK                         |
| <i>IRF8</i>   | Interferon regulatory factor 8   |   |  | x | SPDFEEVTDR<br>IVPEEEQK<br>DEVVQVFDTSQFFR                           |
| <i>ITGB4</i>  | Integrin beta-4                  |   |  |   | VDKDCAYCTDEMFR<br>ALEHVDGTHVCQLPEDQK<br>LVFSALGPTSLR               |
| <i>KLK6</i>   | Kallikrein-6                     | x |  |   | KPNLQVFLGK<br>ESSQEQQSSVVR<br>AVIHPDYDAASHDQDIMLLR<br>LSELIQPLPLER |
| <i>LDLR</i>   | Low-density lipoprotein receptor |   |  |   | NVVALDTEVASNR<br>VFWTDIINEAIFSANR                                  |
| <i>LGALS1</i> | Galectin-1                       | x |  |   | SFVLNLGK<br>FNAHGDANTIVCNSK<br>LNLEAINYMAADGDFK                    |

|               |                                     |   |   |  |                                               |
|---------------|-------------------------------------|---|---|--|-----------------------------------------------|
| <i>LPAR1</i>  | Lysophosphatidic acid receptor 1    |   |   |  | LTVSTWLLR<br>SENPTGPTEGSDR                    |
| <i>LYZ</i>    | Lysozyme C                          |   | x |  | WESGYNTR<br>ATNYNAGDR<br>STDYGIFQINSR         |
| <i>MAG</i>    | Myelin-associated glycoprotein      | x |   |  | LLGDLGLR<br>DTVQCLCVVK<br>SLELPFQGAHR         |
| <i>MBP</i>    | Myelin basic protein                | x | x |  | YLATASTMDHAR<br>DTGILDSIGR<br>TQDENPVVHFFK    |
| <i>MOG</i>    | Myelin-oligodendrocyte glycoprotein | x |   |  | ALVGDEVELPCR<br>FSDEGGFTCFRR<br>DHSYQEEAAMELK |
| <i>MYOF</i>   | Myoferlin                           |   |   |  | IPAHQVLYSTSGENASGK<br>SLGPPGPPFNITPR          |
| <i>QDPR</i>   | Dihydropteridine reductase          | x |   |  | QSIWTSTISSHLATK<br>EGLLTLGAK<br>GAVHQLCQSLAGK |
| <i>S100A4</i> | Protein S100-A4                     |   | x |  | ALDVMVSTFHK<br>ELPSFLGK                       |

|                 |                                                       |   |   |   |                                                                 |
|-----------------|-------------------------------------------------------|---|---|---|-----------------------------------------------------------------|
| <i>SERPIND1</i> | Heparin cofactor II                                   |   |   |   | GGETAQSADPQWEQLNNK<br>QFPILLDFK<br>TLEAQLTPR                    |
| <i>SYNGR1</i>   | Synaptogyrin-1                                        | x |   |   | AGGAFDPYTLVR<br>DNPLNEGTDAAAR                                   |
| <i>STMN1</i>    | Stathmin                                              | x |   |   | ASGQAFELILSPR<br>SKESVPEFPLSPPK<br>ESVPEFPLSPPK                 |
| <i>SYNJ2</i>    | Synaptojanin-2                                        | x |   |   | YDVGSAAYDTSK<br>GGASEEALSAVAPR                                  |
| <i>TGFBI</i>    | Transforming growth factor-beta-induced protein ig-h3 |   |   |   | GRQHGPNVCAVQK<br>STVISYECCPGYEK<br>DGTPPIDAHTR<br>YLYHGQTLETGGK |
| <i>TIMP1</i>    | Metalloproteinase inhibitor 1                         |   | x |   | GFQALGDAADIR<br>FVYTPAMESVCGYFHR<br>EPGLCTWQSLR                 |
| <i>TMEFF2</i>   | Tomoregulin-2                                         |   | x |   | IGDTVTCVCQFK<br>IEVMSLGR                                        |
| <i>TNFRSF1A</i> | Tumor necrosis factor receptor superfamily member 1A  |   | x | x | ECESGSFTASENHLR<br>QNTVCTCHAGFFLR                               |

|               |                                                  |  |   |  |                                       |
|---------------|--------------------------------------------------|--|---|--|---------------------------------------|
| <i>TREM2</i>  | Triggering receptor expressed on myeloid cells 2 |  | x |  | VVSTHNLWLLSFLR<br>VLVEVLADPLDHR       |
| <i>TYROBP</i> | TYRO protein tyrosine kinase-binding protein     |  | x |  | ITETESPYQELQGQR<br>SDVYSDLNTQRPYYK    |
| <i>UBD</i>    | Ubiquitin D                                      |  |   |  | SEEWDLMTFDANPYDSVK<br>TKVPVQDQVLLLGSK |
