# Supplementary material for: Orthologous proteins of experimental de- and remyelination are differentially regulated in the CSF proteome of multiple sclerosis subtypes
Source: PubMed Central journal article supplement (PMC6095600; doi:10.1371/journal.pone.0202530), 2018-08-16
Supplement: pone.0202530.s003.pdf [file pone.0202530.s003.pdf]

**S3 Table****Uniformly detected proteins in 97 CSF samples of MS by targeted quantitative proteomics**

| <b>Protein</b>                                | <b>Peptide sequence</b>                                           | <b>Function</b>                                                                      |
|-----------------------------------------------|-------------------------------------------------------------------|--------------------------------------------------------------------------------------|
| kallikrein-6                                  | AVIHPDYDAASHDQDIMLLR<br>ESSSEQSSVVR<br>KPNLQVFLGK<br>LSELIQPLPLER | serine protease, myelination,<br>axon outgrowth                                      |
| haptoglobin                                   | DIAPTLTLYVGK<br>LRTEGDGVYTLNNEK<br>VTSIQDWVQK<br>YVMLPVADQDQCIR   | antibacterial, antioxidant,<br>acute phase response                                  |
| TIMP-1                                        | EPGLCTWQSLR<br>GFQALGDAADIR                                       | metalloproteinase inhibitor<br>OPC differentiation                                   |
| apolipoprotein C-II                           | ESLSSYWESAK<br>TAAQNLYEK<br>TYLPAVDEK                             | lipoprotein metabolism:<br>VLDL, chylomicron<br>activates lipoprotein lipase         |
| heparin cofactor 2                            | TLEAQLTPR                                                         | thrombin inhibitor;<br>chemotactic for monocytes                                     |
| gelsolin                                      | AVEVLPK<br>DSQEEKTEALTSK<br>EVQGFESATFLGYFK<br>QTQVSVLPEGGETPLFK  | calcium-regulated actin-<br>modulating protein                                       |
| tyrosine-protein kinase<br>receptor UFO (Ax1) | APLQGTLLGYR<br>TATITVLPQQPR                                       | binding growth factor<br>GAS6: anti-apoptotic<br>CML oncogene, cell<br>proliferation |
| lysozyme C                                    | WESGYNTR                                                          | enhance the activity of<br>immunoagents, bacteriolytic                               |
| beta-2-microglobulin                          | VEHSDLSFSK<br>VNHVTLSPK                                           | MHC I                                                                                |
| contactin-2                                   | FAQLNLAAEDTR                                                      | organization of axonal                                                               |

OPC: oligodendrocyte precursor cell; VLDL: very low-density lipoprotein; CML: chronic myeloid leukemia; GAS6: Growth Arrest Specific 6
