# Supplementary material for: Orthologous proteins of experimental de- and remyelination are differentially regulated in the CSF proteome of multiple sclerosis subtypes
Source: PubMed Central journal article supplement (PMC6095600; doi:10.1371/journal.pone.0202530), 2018-08-16
Supplement: pone.0202530.s004.pdf [file pone.0202530.s004.pdf]

**S4 Table**

**Level of peptides relative to the respective stable isotope standard in the CSF of patients with primary progressive (PP), secondary progressive (SP) and relapsing-remitting (RR) multiple sclerosis**

| APOC2, TAAQNLYEK |          |          | UFO, APLQGTLGYS |          |          | TIMP-1, GFQALGDAADIR |          |          | B2M, VNHVTLSPK |          |          |
|------------------|----------|----------|-----------------|----------|----------|----------------------|----------|----------|----------------|----------|----------|
| PP               | SP       | RR       | PP              | SP       | RR       | PP                   | SP       | RR       | PP             | SP       | RR       |
| 0,077267         | 0,0788   | 0,0306   | 0,0012          | 0,024619 | 0,0276   | 0,031                | 0,0144   | 0,0282   | 0,5764         | 1,2229   | 0,402    |
| 0,05725          | 0,04645  | 0,04425  | 0,015633        | 0,01105  | 0,0153   | 0,04035              | 0,0353   | 0,0141   | 0,6429         | 0,5624   | 0,89515  |
| 0,04565          | 0,034125 | 0,01355  | 0,0113          | 0,0155   | 0,028667 | 0,02535              | 0,0197   | 0,0326   | 0,6315         | 0,5909   | 1,097475 |
| 0,0563           | 0,0652   | 0,0423   | 0,0209          | 0,0224   | 0,01165  | 0,0161               | 0,035225 | 0,0229   | 0,20695        | 0,5867   | 0,73895  |
| 0,53615          | 0,05385  | 0,03815  | 0,0164          | 0,01     | 0,0124   | 0,0107               | 0,0495   | 0,0249   | 0,2141         | 0,42265  | 0,706    |
| 0,28825          | 0,1023   | 0,047667 | 0,013           | 0,019    | 0,0389   | 0,03215              | 0,022633 | 0,03875  | 0,4041         | 0,2819   | 0,712911 |
| 0,136833         | 0,0577   | 0,0372   | 0,01475         | 0,0052   | 0,0466   | 0,0022               | 0,027    | 0,0485   | 0,519067       | 0,50725  | 0,607925 |
| 0,0642           | 0,04245  | 0,01675  | 0,0037          | 0,028267 | 0,00745  | 0,027133             | 0,0315   | 0,0616   | 0,322033       | 0,51815  | 0,437675 |
| 0,1681           | 0,0978   | 0,0409   | 0,009333        | 0,0288   | 0,016    | 0,01195              | 0,08465  | 0,032925 | 0,746533       | 0,1797   | 0,623    |
| 0,028933         | 0,0172   | 0,0491   | 0,0259          | 0,0131   | 0,025    | 0,0159               | 0,031975 | 0,0318   | 0,629633       | 0,116    | 0,7932   |
| 0,0379           | 0,0704   | 0,0413   | 0,013467        | 0,01925  | 0,013    | 0,019067             | 0,05275  | 0,0225   | 0,6565         | 0,482067 | 0,8309   |
| 0,032733         | 0,369233 | 0,0452   | 0,0165          | 0,00755  | 0,0141   | 0,023                | 0,02885  | 0,01865  | 0,439733       | 0,3705   | 0,5083   |
| 0,06445          | 1,040833 | 0,0347   | 0,0049          | 0,0125   | 0,03165  | 0,029333             | 0,0094   | 0,01075  | 0,4618         | 0,490667 | 0,3753   |
| 0,04235          | 0,02595  | 0,0277   | 0,0086          | 0,008467 | 0,020025 | 0,008                | 0,071857 | 0,054    | 0,3719         | 0,5552   | 0,3899   |
| 0,0564           | 0,48865  | 0,0321   | 0,0096          | 0,0004   | 0,0056   | 0,026933             | 0,0933   | 0,0375   | 0,9103         | 0,8005   | 0,4212   |
| 0,06285          | 0,0423   | 0,0659   | 0,007367        | 0,00665  | 0,0239   | 0,0133               | 0,00135  | 0,0309   | 0,64595        | 0,51735  | 0,9869   |
| 0,04525          | 0,070095 | 0,0658   | 0,02025         | 0,0208   | 0,0277   | 0,0063               | 0,0329   | 0,01645  | 0,328          | 0,996619 | 0,4654   |
| 0,03975          | 0,037251 | 0,0448   | 0,0081          | 0,0175   | 0,03055  | 0,04265              | 0,03005  | 0,039467 | 0,093          | 0,781853 | 0,9114   |
| 0,2347           | 0,0587   | 0,0314   | 0,015167        | 0,0114   | 0,014825 | 0,0234               | 0,0244   | 0,08     | 0,3477         | 0,7075   | 0,349    |
| 0,0511           | 0,0942   | 0,0407   | 0,01285         | 0,00755  | 0,010925 | 0,03655              | 0,0251   | 0,0346   | 0,3224         | 0,381    | 0,44145  |
| 0,0272           | 0,0416   | 0,0496   | 0,008           | 0,0011   | 0,03465  | 0,036                | 0,00375  | 0,0701   | 0,5349         | 0,5862   | 0,47105  |
| 0,0351           | 0,0716   | 0,042    | 0,0272          | 0,007667 | 0,0257   | 0,00925              | 0,0102   | 0,0541   | 0,07145        | 0,594    | 0,5253   |
| 0,0153           | 0,0432   | 0,0304   | 0,0093          | 0,025136 | 0,007875 | 0,0286               | 0,0177   | 0,04345  | 0,4421         | 0,9314   | 0,6281   |
| 0,0371           | 0,01825  | 0,0508   | 0,0074          | 0,012467 | 0,00975  | 0,012467             | 0,03225  | 0,0596   | 0,6352         | 0,09385  | 0,5745   |
| 0,0734           | 0,0484   | 0,0361   | 0,01445         | 0,0108   | 0,0162   | 0,0203               | 0,055299 | 0,0262   | 0,5471         | 0,7502   | 0,7876   |
| 0,040267         | 0,050667 | 0,0312   | 0,0139          | 0,0163   | 0,02445  | 0,0235               | 0,0191   | 0,032533 | 0,42           | 0,725467 | 0,57635  |
| 0,02665          | 0,1264   | 0,0498   | 0,011267        | 0,0151   | 0,0165   | 0,0204               | 0,039067 | 0,0102   | 0,5269         | 0,2195   | 0,6835   |

|        |  |          |         |  |          |         |  |         |         |  |          |
|--------|--|----------|---------|--|----------|---------|--|---------|---------|--|----------|
| 0,0357 |  | 0,0192   | 0,01525 |  | 0,03095  | 0,0329  |  | 0,0181  | 0,57985 |  | 0,88615  |
| 0,0437 |  | 0,0235   | 0,0144  |  | 0,024444 | 0,03965 |  | 0,0278  | 0,5762  |  | 0,72865  |
| 0,068  |  | 0,0488   | 0,01265 |  | 0,0081   | 0,0272  |  | 0,0294  | 0,4861  |  | 0,7748   |
|        |  | 0,0509   |         |  | 0,0145   |         |  | 0,0366  |         |  | 0,7083   |
|        |  | 0,0876   |         |  | 0,01995  |         |  | 0,04305 |         |  | 0,79605  |
|        |  | 0,04075  |         |  | 0,03995  |         |  | 0,02825 |         |  | 0,927    |
|        |  | 0,0491   |         |  | 0,0133   |         |  | 0,03275 |         |  | 0,5986   |
|        |  | 0,1201   |         |  | 0,0325   |         |  | 0,0221  |         |  | 0,4357   |
|        |  | 0,034267 |         |  | 0,01245  |         |  | 0,0696  |         |  | 0,855067 |
|        |  | 0,04785  |         |  | 0,0121   |         |  | 0,03915 |         |  | 0,31475  |
|        |  | 0,0377   |         |  | 0,0117   |         |  | 0,02665 |         |  | 0,68345  |
|        |  | 0,0391   |         |  | 0,0147   |         |  | 0,02015 |         |  | 0,3208   |
|        |  | 0,0749   |         |  | 0,00595  |         |  | 0,01295 |         |  | 0,20865  |
